# Supplementary material for: Unique chains of alternating octahedral and tetrahedral cobalt(ii) sites: crystal structures of the novel chloro-bridged complexes [Co4(μ-Cl)6Cl2(thf)4(MeOH)2]n and [{Co4(μ-Cl)6Cl2(thf)4(H2O)2}·2THF]n
Source: Royal Society of Chemistry journal article supplement (doi:10.1039/b003213l), 2000-01-01
Supplement: b003213l.doc [file b003213l.doc]

## Electronic supplementary information (ESI) for manuscript : b003213l

**Unique chains of alternating octahedral and tetrahedral cobalt(II) sites : crystal structures of the novel chloro-bridged complexes [Co4(-Cl)6Cl2(thf)4(MeOH)2]n and [Co4(-Cl)6Cl2(thf)4(H2O)22THF]n**

# Jean-Cyrille Hierso,a Dianne D. Ellis,b Anthony L. Spek, b Elisabeth Bouwmana* and Jan Reedijka

Elemental analysis (%): calc. for C9H20Cl4O3Co2·½C4H8O: C, 28.00; H, 5.08. Found : C, 28.92 H, 5.01. Selected IR (cm-1): 864vs, br, 918m; 1023vs, COC stretching; 2876m, 2965m, CH2 stretching; 3424w, br, OH stretching. IR bands in (**2**) are shifted to 868vs, br, 916m, 1028vs; 1645w, br, HOH bending; 2875m, 2970m; 3345w, br, HOH stretching. Vis-NIR (solid state, cm-1) :  = 6600, 12000sh, 15000, 19000sh, 36000. Infra red spectra were obtained on a Perkin-Elmer Paragon 1000 FTIR spectrophotometer equipped with a Golden Gate ATR device. Magnetisation was measured with a Quantum Design SQUID device MPMS-5S with an applied field of 0.5 Tesla. Diamagnetic corrections for the sample were calculated from Pascal constants. FT-IR measurements on complex **1** under air show that it reacts readily with water from the atmosphere. The changes in time indicate that the thf ligands are progressively replaced by water molecules, leading to a CoCl2 hydrate type compound. After a few minutes under air the Vis-NIR spectrum shows that the octahedral/tetrahedral motif of the chains is highly disrupted.

Temperature dependence of the spin-only effective magnetic moment of (**1**) per asymmetric unit Co2 between in 5-260 K in a 0.5 Tesla field.
